# Supplementary material for: Adsorption of NO on ordered mesoporous carbon and its improvement by cerium
Source: Royal Society of Chemistry journal article supplement (doi:10.1039/c4ra01409j), 2014-03-17
Supplement: c4ra01409j1.pdf [file c4ra01409j1.pdf]

## **Supplementary Information for:**

### **Adsorption of NO on ordered mesoporous carbon and its improvement by cerium**

Feifei Cao, Jinghuan Chen, Mingjiang Ni, Hao Song, Gang Xiao, Weihong Wu, Xiang Gao\*,

Kefa Cen

*State Key Laboratory of Clean Energy Utilization, Zhejiang University, Hangzhou  
310027, Zhejiang, China*

**Number of Supplementary Material pages (including this title page): 4**

**Table S1 Deconvolution of XPS core-level Ce 3d of the samples (p. S3)**

**Table S2 Deconvolution of XPS core-level C 1s of the samples (p. S3)**

**Fig. S1 Ce 3d core level XP spectra of the Ce-OMC and Ce-OMC ED (p. S4)**

---

\* Corresponding author e-mail: [xgao1@zju.edu.cn](mailto:xgao1@zju.edu.cn)

The XPS analysis results of Ce 3d and C 1s are summarized in Table S1 and S2. Table S1 gives the specific data and Fig. S1 shows the Ce 3d core level XP spectra, which were not shown in the article. It can be seen that more Ce<sup>4+</sup> were generated with the exposure to NO and O<sub>2</sub>, which may be due to the fact that a part of oxygen vacancy V<sub>o</sub> was filled in the presence of O<sub>2</sub>.

As shown in Table S2, the C 1s core level XP spectra have been resolved into four individual peaks representing graphitic carbon (C-C), carbon present in alcohol or ether groups (C-O), carboxyl or ester groups (O-C=O), and shake-up satellite peaks due to  $\pi$ - $\pi^*$  transitions in the aromatic rings. It can be seen that the proportion of C-O and O-C=O groups was increased with the introduction of cerium which was consistent with the EDX and CO/CO<sub>2</sub>-TPD results. After the exposure to NO and O<sub>2</sub>, the proportion of C-O group increased for both OMC and Ce-OMC. This was also consistent with the FTIR results, which showed that the surface-adsorbed species was C-O-N=O.

**Table S1**

Deconvolution of XPS core-level Ce 3d of the samples.

| Samples | Binding energy (relative peak areas), eV (%) |        |       |        |        |        |                  |       |
|---------|----------------------------------------------|--------|-------|--------|--------|--------|------------------|-------|
|         | Ce <sup>4+</sup>                             |        |       |        |        |        | Ce <sup>3+</sup> |       |
|         | V                                            | V''    | V'''  | U      | U''    | U'''   | V'               | U'    |
| Ce-OMC  | 882.2                                        | 888.6  | 898.0 | 900.7  | 907.2  | 916.15 | 884.4            | 903.9 |
|         | (18.8)                                       | (13.4) | (8.7) | (15.9) | (9.8)  | (6.7)  | (17.5)           | (9.2) |
| Ce-OMC  | 882.2                                        | 888.6  | 898.0 | 900.7  | 907.2  | 916.15 | 884.4            | 903.9 |
| ED      | (7.4)                                        | (20.9) | (6.8) | (13.3) | (22.7) | (13.0) | (10.4)           | (5.4) |

**Table S2**

Deconvolution of XPS core-level C 1s of the samples.

| Samples   | Binding energy (relative peak areas), eV (%) |              |              |                 |
|-----------|----------------------------------------------|--------------|--------------|-----------------|
|           | C-C                                          | C-O          | O-C=O        | $\pi$ - $\pi^*$ |
| OMC       | 284.5 (64.8)                                 | 286.0 (20.0) | 287.5 (6.2)  | 290.2 (9.0)     |
| OMC ED    | 284.5 (68.1)                                 | 286.2 (22.7) | 288.0 (5.3)  | 289.9 (4.0)     |
| Ce-OMC    | 284.5 (64.9)                                 | 285.9 (22.9) | 288.4 (9.9)  | 291.0 (2.3)     |
| Ce-OMC ED | 284.4 (46.6)                                 | 286.2 (27.2) | 288.0 (18.3) | 289.9 (7.9)     |

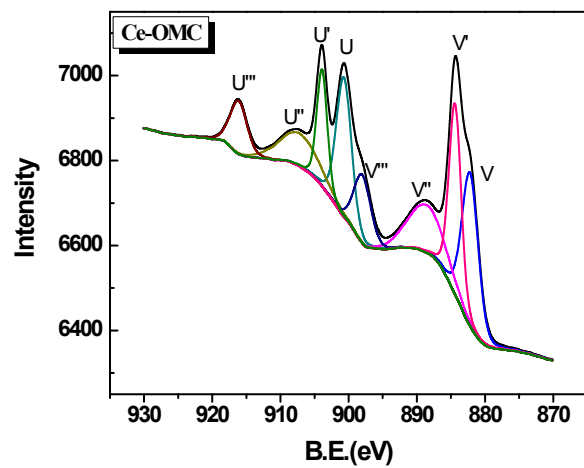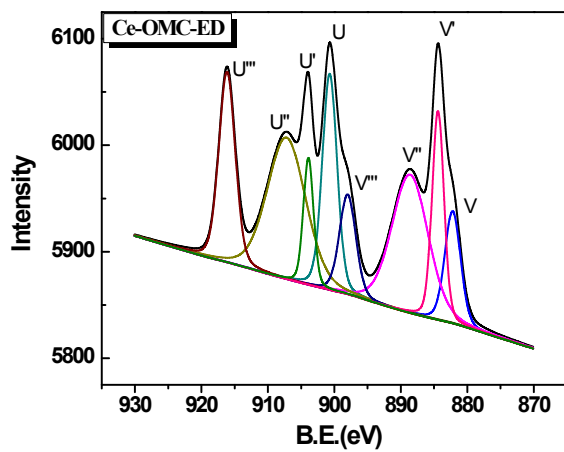

**Fig. S1** Ce 3d core level XP spectra of the Ce-OMC and Ce-OMC ED.
